# Supplementary material for: The Use of Simulation for Undergraduate Surgical Education in Sub-Saharan Africa: A Scoping Review
Source: Research Square preprint supplement (doi:10.21203/rs.3.rs-2242593/v1), 2023-01-17
Supplement: Supplementary file 1 [file 7fc1824737491469179364d8.docx]

| Study | Title | Year Published | Year of study | Country | Institution/ Hospital/site | Target group | Skills taught | Inclusion of non-technical skills | Fidelity | Existing or new program | Recurring or one-off | Specialty | Engineering/ Medical Educational Collaboration | The Medical Education Research Study Quality Instrument (MERSQI) |
| --- | --- | --- | --- | --- | --- | --- | --- | --- | --- | --- | --- | --- | --- | --- |
| Adeyemi-Doro 1983 (22) | A new course in basic therapeutic skills for medical and dental students at the College of Medicine, University of Lagos: student evaluation | 1983 | 1980/ 1981 | Nigeria | College of Medicine, University of Lagos | Medical and dental Students | Suturing of skin lacerations, Incision and drainage of abscesses, Cardiopulmonary resuscitation, Reduction of temporomandibular joint dislocation, Eyelet jaw wiring, Inferior dental regional nerve block | No | low fidelity | Existing  (>1 year) | Recurring | General Surgery | None | 12.5 |
| Bekele 2019 (23) | Trends in Retention and Decay of Basic Surgical Skills: Evidence from Addis Ababa University, Ethiopia: A Prospective Case-Control Cohort Study | 2019 | 2015 | Ethiopia | Addis Ababa University | Medical students | Identification of surgical instruments, simple interrupted suturing and one-handed knot tying, intestinal skills such as perforation repair and anastomosis, abdominal wall incision and closure, catheterization, chest tube insertion and basics of airway management | No | wet, dry, low fidelity | Existing  (>1 year) | Recurring | General surgery | None/FAIMER fellow | 14.5 |
| Elharram 2017 (24) | Global Health Values of a Multidirectional Near Peer Training Program in Surgery, Pathology, Anatomy, Research Methodology, and Medical Education for Haitian, Rwandan, and Canadian Medical Students | 2017 | 2015 | Held in Canada invited Haiti, Rwanda | University of Kigali, Rwanda and Université Quisqueya, Haiti | Medical students | Suturing and knot tying, orthopedic casting and splinting, and Foley catheter and nasogastric tube insertion | No | - | Existing  (>1 year) | Recurring | General Surgery | Yes, McGill | 8 |
| Bulamba 2019 (25) | Feasibility of Simulation-Based Medical Education in a Low-Income Country: Challenges and Solutions From a 3-year Pilot Program in Uganda | 2019 | 2019 | Uganda | Makerere University College of Health Sciences, Busitema University Faculty of Health Sciences | Bachelor of Science in Anesthesia program, Clinical year medical students, |  | No | low and high fidelity | New | - | Anesthesia, Obstetrics/ Gynaecology, Trauma, Orthopedics and General surgery | Yes | N/A |
| Tjoflåt 2017 (26) | Implementing simulation in a nursing education programme: a case report from Tanzania | 2017 | 2017 | Tanzania |  | Ordinary Diploma Programme in Nursing | Primary survey, implementing relevant nursing interventions and working as a team, post-operative care | Yes | low fidelity | New | One off | Nursing | Yes- took over the programme | 5.5 |
| Makkink 2019 (27) | For the students, by the students: Student perceptions of low cost medical moulage in a resource-constrained environment | 2019 | 2018 | South Africa | University of Johannesburg | Bachelor's degree in Emergency Medical Care at the | Wound care | No | low fidelity (moulage) | New | Recurring | Emergency Medical Care | No | 8.5 |
| Murthy 2020 (28) | A Randomized Cross-Over Trial Focused on Clinical Breast Exam Skill Acquisition Using High Fidelity versus Low Fidelity Simulation Models in Rwanda | 2020 | 2014/ 2015 | Rwanda | University Teaching Hospital of Kigali | Medical students | Clinical breast examination | No | high and low fidelity | New | One off | General Surgery | Brigham and Women's CSPH | 15.5 |
| Data 2020 (29) | Feasibility of an Interprofessional, Simulation-Based Curriculum to Improve Teamwork Skills, Clinical Skills, and Knowledge of Undergraduate Medical and Nursing Students in Uganda: Cohort Study | 2020 |  | Uganda | Mbarara University of Science and Technology | Medical and nursing students | Management of postpartum hemorrhage for obstetrics postoperative bleeding for surgery | No | high fidelity | New | One off | General Surgery, Obstetrics/ Gynaecology | KidSIM simulation program (University of Calgary), Stavanger Acute Medicine Foundation for Education and Research (SAFER) | 13.5 |
| Gedlu 2015 (30) | Introduction of simulation based medical education at Addis Ababa University College Of Health Sciences: experience and challenge | 2015 | 2015 | Ethiopia | Addis Ababa University | Core clinical educators for undergrad teaching inclusive |  | No | low fidelity | - | - | - | MEPI (Medical Education Partnership Initiative | 9.5 |
| Wanjiku 2017 (31) | Assessing the impact of an emergency trauma course for senior medical students in Kenya | 2017 | 2015 | Kenya | Moi College of Health Sciences | Medical Students | Cricothyroidotomy, intravenous access, tube thoracostomy, extended-Focused Assessment Sonography for Trauma, Scenarios include closed head injury requiring intubation, blunt abdominal trauma in a pregnant woman, gunshot wound to the right chest and blunt abdominal trauma from a motorcycle accident | Yes | low fidelity | New | One off | Surgery | Academic Model Providing Access to Healthcare (AMPATH), a consortium of North American academic health centres involved in research and health care in Kenya. | 10 |
| Taché 2009 (32) | Addressing gaps in surgical skills training by means of low-cost simulation at Muhimbili University in Tanzania | 2009 | 2008 | Tanzania | The Muhimbili University of Health and Allied Sciences | Medical Students | Scrubbing, gowning, gloving, patient preparation, surgical knot tying, venous cutdown, adult intubation, chest tube insertion, laparotomy, small bowel repair, vacuum assisted vaginal delivery | No | dry lab, low fidelity, high fidelity | New | One off | General Surgery, Orthopaedics, Anesthesia and Obstetrics/ Gynaecology | Canadian Network for International Surgery AND UCSF | 12.5 |
| Turatsinze 2020 (33) | Medical student satisfaction and confidence in simulation-based learning in Rwanda - Pre and post-simulation survey research | 2020 | 2018 | Rwanda |  | Medical Students | Pediatric procedures- relevant to paediatric surgery ABCDE clinical assessment, interosseus insertion, intravenous access, inter-professional communication skills, decision making, time management, patient safety and prescribing, all in a protected environment. Inter-professional communication skills | Yes | low fidelity | New | One off | Paediatrics | - | 12.5 |
| Najjuma 2020 (34) | Stakeholder perceptions about the establishment of medical simulation-based learning at a university in a low resource setting: a qualitative study in Uganda | 2020 |  | Uganda | Mbarara University of Science and Technology | Students enrolled in the Bachelor of Medicine and Surgery, and Bachelor of Nursing Science | Assessing factors that will affect formation of a simulation centre | No |  | - |  | - | - | 9.5 |
| Peluso 2017 (35) | Strengthening medical training programmes by focusing on professional transitions: a national bridging programme to prepare medical school graduates for their role as medical interns in Botswana | 2017 |  | Botswana | Ministry of Health, the Botswana Health Professions Council, and the University of Botswana, | Just after medical school, pre internship | Surgical skills workshop, Management of epistaxis, polytrauma, plaster application, evaluation and management of surgical wounds, suturing, knot tying | No |  | - |  | MIT stakeholders (Ministry of Health, Botswana Health Professions Council, University of Botswana Faculty of Medicine), and its international partners. These included the Botswana-Harvard Partner- ship, University of Pennsylvania, University of Maryland, World Health Organization, and the University Research Co. (URC), | | 10 |
| Ravi 202(36) | Undergraduate Surgical Education: a Global Perspective | 2021 |  |  |  |  |  |  |  |  |  |  |  | 9.5 |
|  |  |  |  | Kenya | University of Nairobi | Medical students | Student societies organise structured courses on basic surgical skills | No |  | - |  | - | - |  |
|  |  |  | 2021 | Somali-land | Amoud University, College of Health Science. School of Medicine and G Surgery | Medical students | Student societies, in partner- ship with international societies (e.g. InciSioN, International Association of Student Surgical Societies), organise conferences and short courses which cover topics such as suturing, sterilisation, and the WHO surgical safety checklist | No |  | - |  | - | - | - |
| Saad 1991 (37) | An oral practical examination in emergency clinical surgery | 1991 |  | Sudan | Faculty of Medicine of Khartoum | final year Medical students | Emergency surgery and traumatology assessment. A third of aggregate marks | No |  | Existing  (>1 year) | Recurring | General surgery and Traumatology | None | 7 |
| Dery 2019 (38) | Design and evaluation of a subcutaneous contraceptive implant training simulator | 2019 | 2015 | Ghana | CHNs training school in Winneba | Undergraduate nursing students | Insertion of subcutaneous contraceptive implants | No |  | - | One off | Obstetrics/ Gynaecology | Yes, Biomedical engineer Ghana/Ann arbour Mech engineering, design science | 11 |
| Ullrich 2020 (39) | Design, implementation and long-term follow-up of a context specific trauma training course in Uganda: Lessons learned and future directions | 2020 | 2013/2016 | Uganda | Kampala Advanced Trauma Course at Mulago National Referral Hospital | Interns, just after medical school | Primary, secondary, tertiary survey, and application of Plaster of Paris, Basic Life Support, Burr hole procedure, Venous cut down, Chest drainage | No | low fidelity | Existing  (>1 year) | Recurring | General surgery | Yes, Yale, UCSF | 13 |
| Owolabi 2021 (40) | Implementation of Innovative Educational Technologies in Teaching of Anatomy and Basic Medical Sciences During the COVID-19 Pandemic in a Developing Country: The COVID-19 Silver Lining? | 2021 | 2020 | Rwanda | University of Global Health Equity | Pre-clinical med students | Haemorrhage control, intravenous access, intubation, and basic intensive care- integrated curriculum | No | high fidelity | Existing  (>1 year) | Recurring | Surgery, Obstetrics/ Gynaecology, Emergency medical care | - | - |
